# Supplementary material
Source: MDPI journal article supplement (https://www.mdpi.com/2673-7167/4/2/10)
Supplement: s1 [file s1]

# Comprehensive study of equilibrium structure of trans-azobenzene: gas electron diffraction and quantum chemical calculations

Alexander E. Pogonin<sup>1,\*</sup>, Ivan Yu. Kurochkin<sup>2</sup>, Alexey V. Eroshin<sup>3</sup>, Maksim N. Zavalishin<sup>4</sup> and Yuriy A. Zhabanov<sup>2,\*</sup>

<sup>1</sup> Department of Ceramics Technology and Electrochemical Production, Ivanovo State University of Chemistry and Technology, Sheremetevskiy av. 7, 153000 Ivanovo, Russia

<sup>2</sup> Department of Physics, Ivanovo State University of Chemistry and Technology, Sheremetevskiy av. 7, 153000 Ivanovo, Russia; ivan.kurochkin.95@bk.ru (I.Y.K.)

<sup>3</sup> Department of Physical and Colloidal Chemistry, Ivanovo State University of Chemistry and Technology, Sheremetevskiy av. 7, 153000 Ivanovo, Russia; alexey.yeroshin@gmail.com

<sup>4</sup> Department of General Chemical Technology, Ivanovo State University of Chemistry and Technology, Sheremetevskiy av. 7, 153000 Ivanovo, Russia; zavalishin00@gmail.com

\* Correspondence: pogonin@isuct.ru, zhabanov@gmail.com

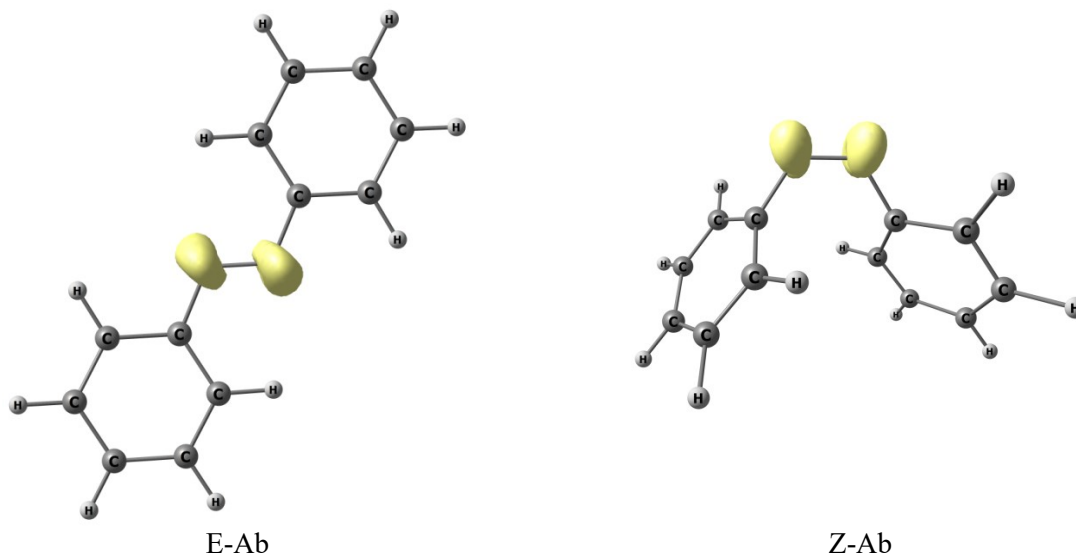

**Figure S1.** FOD plot for AB. The FOD plots were generated with the “orca-plot” utility program included in the ORCA. A density plot with resolution 120×120×120 was generated from the FOD after TPSS/def2-TZVP/ $T_{el}=5000K$  finite temperature SCF iterations in B3LYP/pcseg-2 optimized geometry were converged. Visualization of FOD plot (in yellow) made by the ChemCraft program with Contour value 0.005.

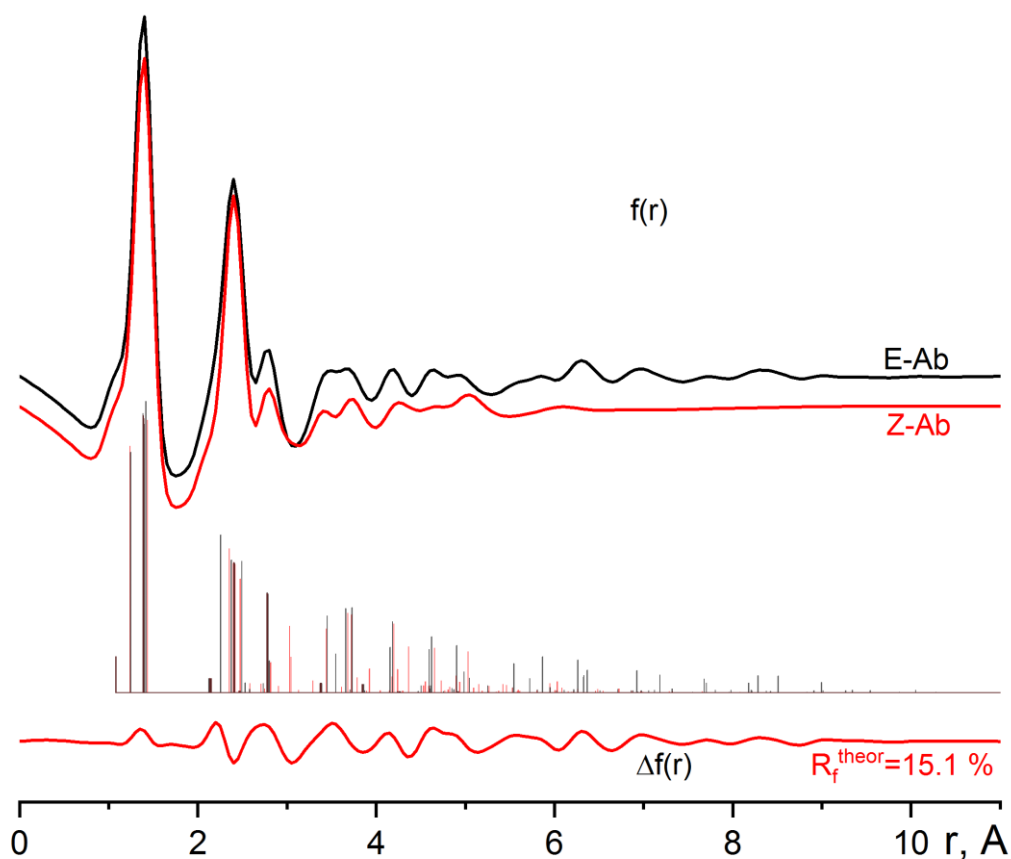

**Figure S2.** Comparison of theoretical radial distribution functions  $f(r)$  of E-AB and Z-AB.

Calculations of the theoretical radial distributions curves  $f(r)$  were performed using classic mode in the UNEX program. It is essentially a sine-Fourier transformation of corresponding theoretical molecular scattering intensities  $sM(s)$  curves

$$f(r) = \int_{s_{min}}^{s_{max}} sM(s) \sin(sr) e^{-bs^2} ds$$

where  $f(r)$  is radial distributions curve,  $sM(s)$  – theoretical molecular scattering intensities curve,  $s$  – scattering variable,  $r$  – internuclear distances,  $b$  – damping factor,  $R_f^{theor}$  – a factor of disagreement between theoretical molecular scattering intensities  $sM(s)$  of Z-AB and planar E-AB which was calculated as:

$$R_f^{theor} = \sqrt{\frac{\sum_{i=1}^N (s_i M(s_i)_{Z-AB} - k_M s_i M(s_i)_{E-AB})^2}{\sum_{i=1}^N (s_i M(s_i)_{Z-AB})^2}} \cdot 100\%$$

where  $s_i M(s_i)$  are theoretical molecular scattering intensities;  $k_M$  is the scale factor. Differences function  $\Delta f(r)$  was calculated concerning planar E-AB –  $\Delta f(r) = f_{Z-AB}(r) - f_{E-AB}(r)$ . Molecular parameters were calculated at B3LYP-D3/pcseg-2 theory level. Vibrational amplitudes and corrections ( $r_{h1} - r_a$ ) were obtained from the harmonic force fields using the VibModule program for the B3LYP-D3/pcseg-2 calculations.

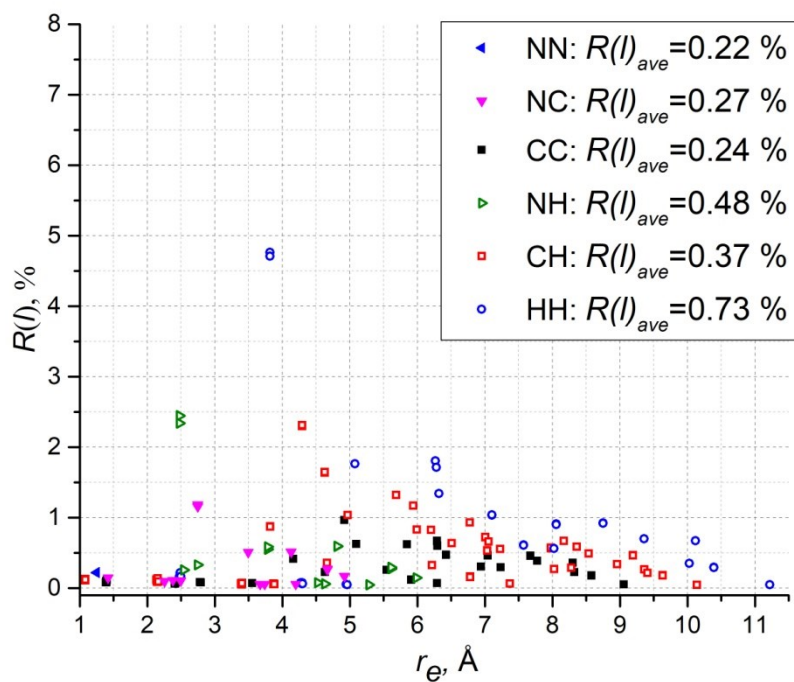

**Figure S3.** Relative ranges of vibrational amplitudes  $R(l)$  for pairs of atoms  $X_i$  and  $Y_j$  ( $X_i, Y_j = H, C, N$ ) determined by equation (8). To determine vibrational amplitudes  $l$ , the results of calculations with 13 different DFT functionals (B3LYP, B97D, B98, BMK, BP86, CAM-B3LYP, M06, mPW1PW91, PBE, PBE0, TPSSh, VSXC, X3LYP) were used.

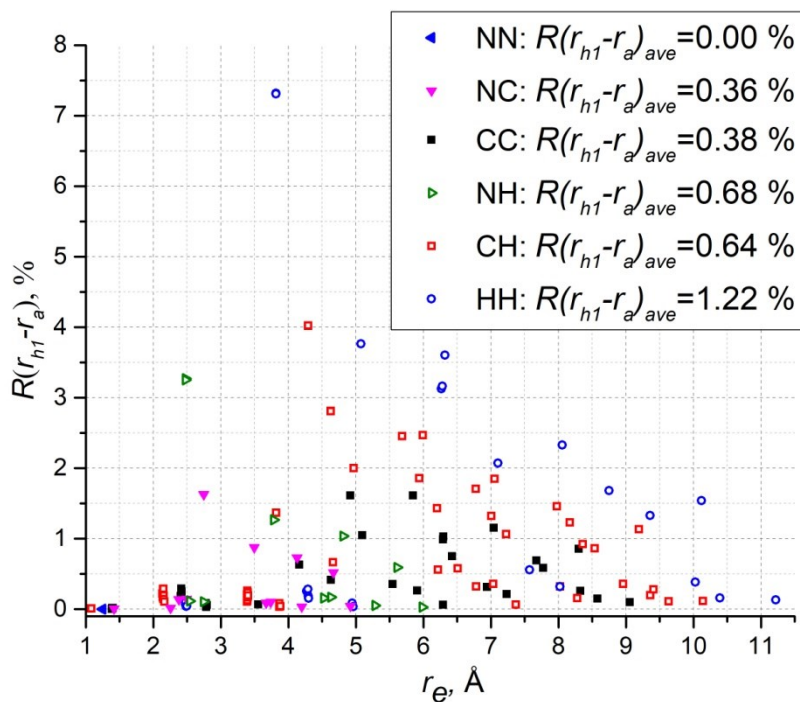

**Figure S4.** Relative ranges of vibrational corrections  $R(r_{h1}-r_a)$  for pairs of atoms  $X_i$  and  $Y_j$  ( $X_i, Y_j = H, C, N$ ) determined by equation (3). To determine vibrational corrections  $r_{h1}-r_a$ , the results of calculations with 13 different DFT functionals (B3LYP, B97D, B98, BMK, BP86, CAM-B3LYP, M06, mPW1PW91, PBE, PBE0, TPSSh, VSXC, X3LYP) were used.

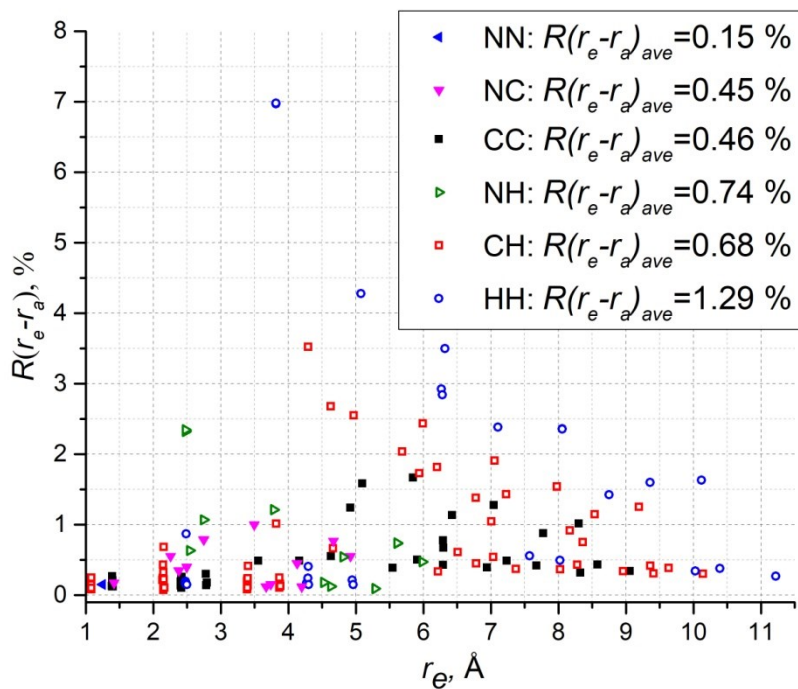

**Figure S5.** Relative ranges of vibrational corrections  $R(r_e - r_a)$  for pairs of atoms  $X_i$  and  $Y_j$  ( $X_i, Y_j = \text{H, C, N}$ ) determined by equation (8). To determine vibrational corrections  $r_e - r_a$ , the results of calculations with 13 different DFT functionals (B3LYP, B97D, B98, BMK, BP86, CAM-B3LYP, M06, mPW1PW91, PBE, PBE0, TPSSH, VSXC, X3LYP) were used.

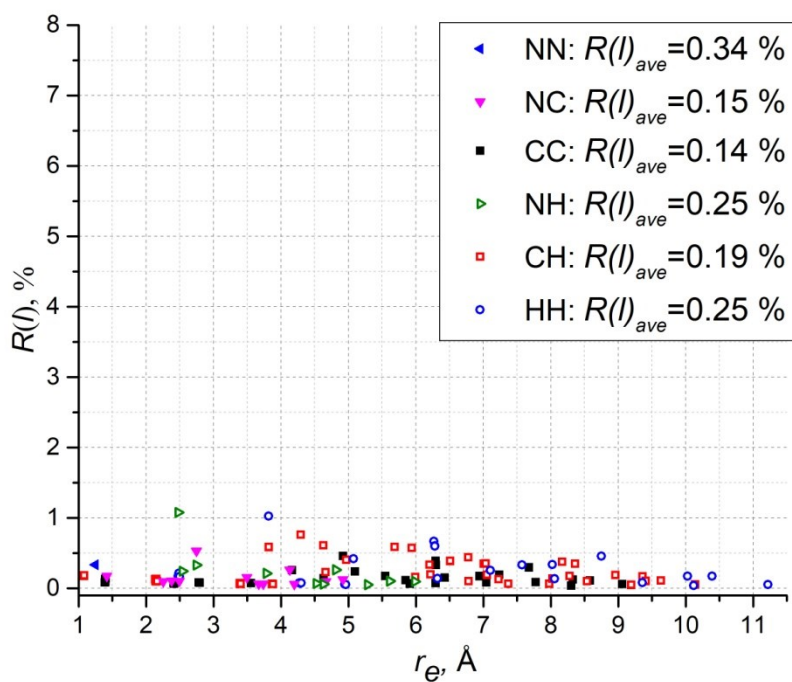

**Figure S6.** Relative ranges of vibrational amplitudes  $R(l)$  for pairs of atoms  $X_i$  and  $Y_j$  ( $X_i, Y_j = \text{H, C, N}$ ) determined by equation (8). To determine vibrational amplitudes  $l$ , the results of calculations with 16 different DFT functionals (B3LYP, B97D, B98, BMK, BP86, CAM-B3LYP, LC-wPBE, M05, M06, M06HF, mPW1PW91, PBE, PBE0, TPSSH, VSXC, X3LYP) were used. The first frequency corresponding to phenyl moieties rotations was ignored when calculating the vibrational amplitudes  $l$ .

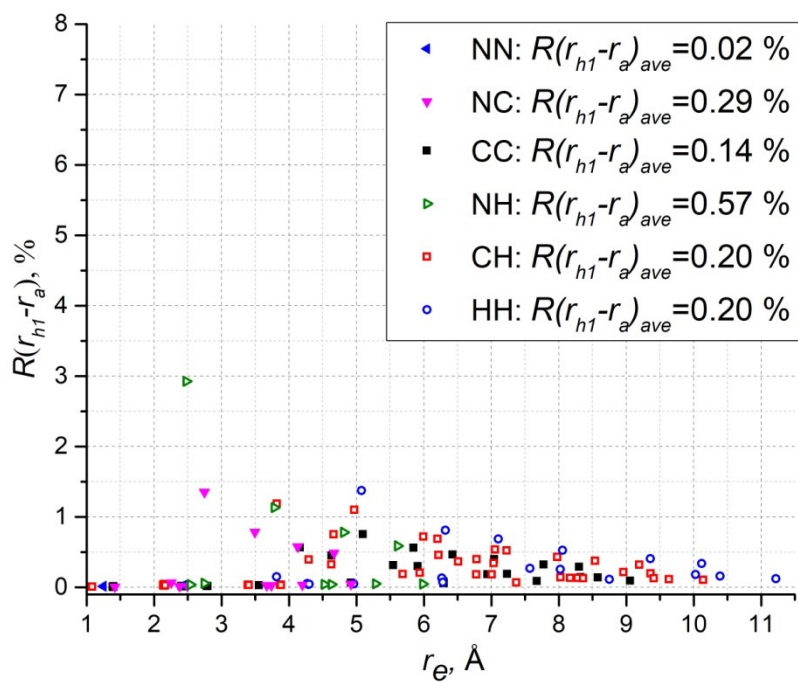

**Figure S7.** Relative ranges of vibrational corrections  $R(r_{h1}-r_a)$  for pairs of atoms  $X_i$  and  $Y_j$  ( $X_i, Y_j = \text{H, C, N}$ ) determined by equation (8). To determine vibrational corrections  $r_{h1}-r_a$ , the results of calculations with 16 different DFT functionals (B3LYP, B97D, B98, BMK, BP86, CAM-B3LYP, LC-wPBE, M05, M06, M06HF, mPW1PW91, PBE, PBE0, TPSSH, VSXC, X3LYP) were used. The first frequency corresponding to phenyl moieties rotations was ignored when calculating the vibrational corrections  $r_{h1}-r_a$ .

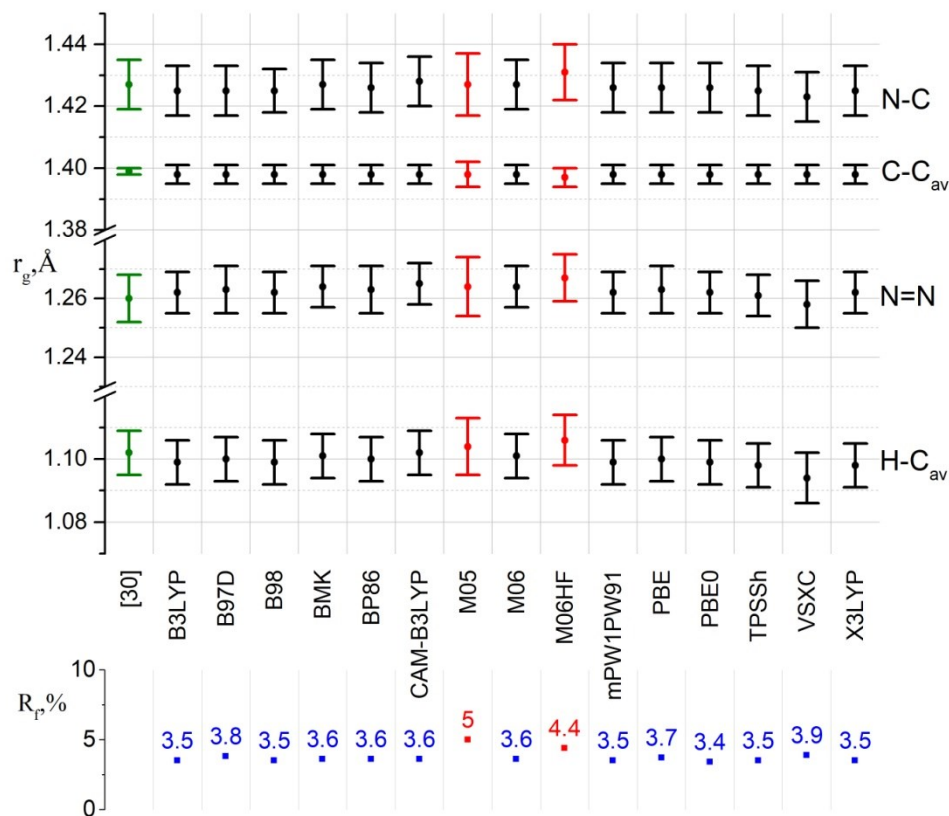

**Figure S8.** Results ( $r_g$ ,  $R_f$ ) of GED structural refinement for E-AB in the framework of MOCED method using starting parameters  $r_e$ ,  $l$ ,  $r_{\text{H1}}-r_a$  obtained by different DFT calculations compared to results of S. Konaka and coworkers [30]. The results for LC-wPBE data were removed due to the completely unsatisfactory  $R_f$  value.

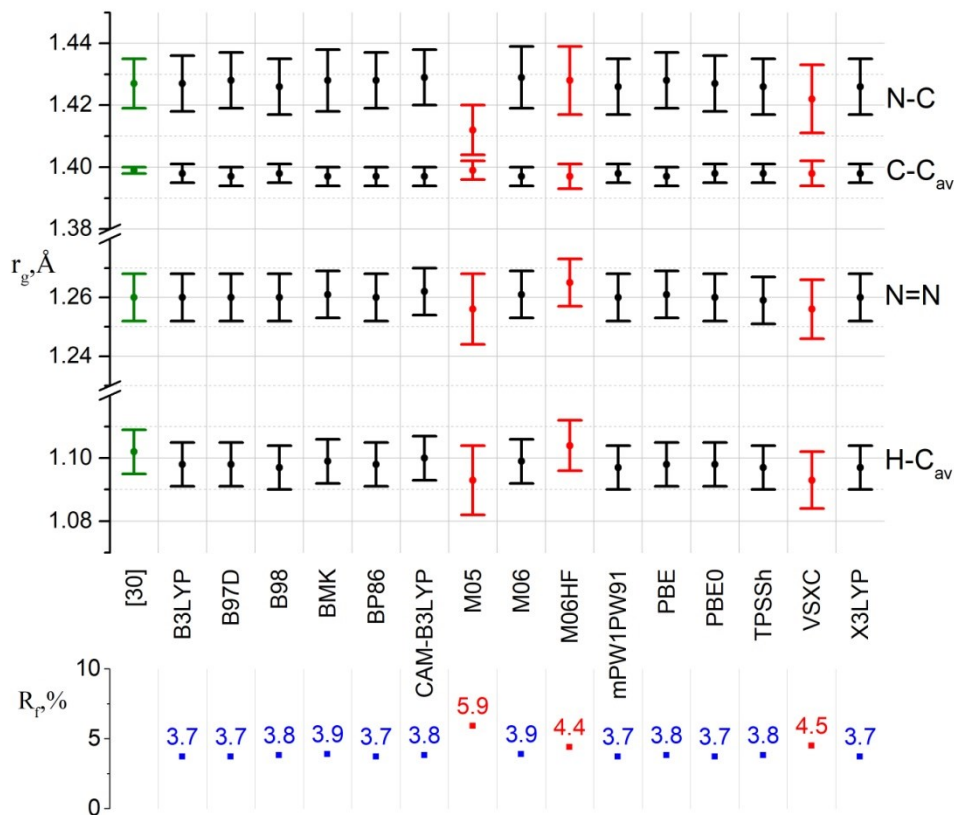

**Figure S9.** Results of GED structural refinement for E-AB in the framework of MOCED method using starting parameters  $r_e$ ,  $l$ ,  $r_e-r_a$  obtained by different DFT calculations compared to results of S. Konaka and coworkers [30]. The results for LC-wPBE data were removed due to the completely unsatisfactory  $R_f$  value.



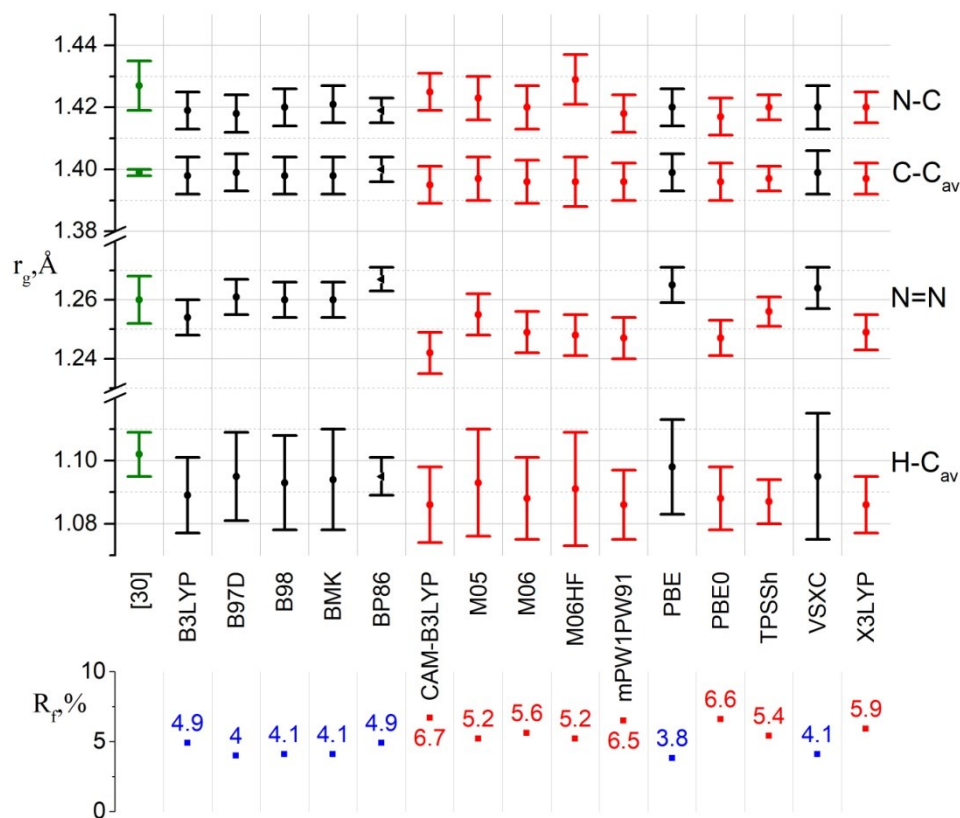

**Figure S10.** Results of GED structural refinement for E-AB in the framework of RM using starting parameters  $r_e$ ,  $l$ ,  $r_{H1}-r_a$  obtained by different DFT calculations compared to results of S. Konaka and coworkers [30]. The results for LC-wPBE data were removed due to the completely unsatisfactory  $R_f$  value.

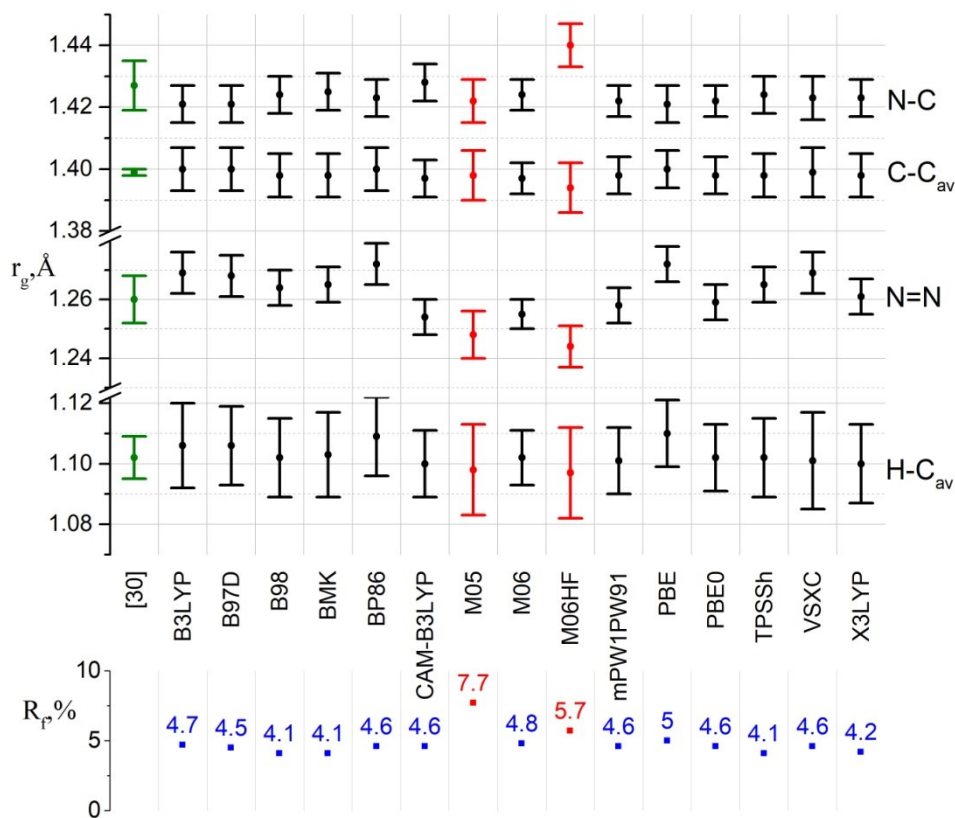

**Figure S11.** Results of GED structural refinement for E-AB in the framework of RM using starting parameters  $r_e$ ,  $l$ ,  $r_e-r_a$  obtained by different DFT calculations compared to results of S. Konaka and coworkers [30]. The results for LC-wPBE data were removed due to the completely unsatisfactory  $R_f$  value.

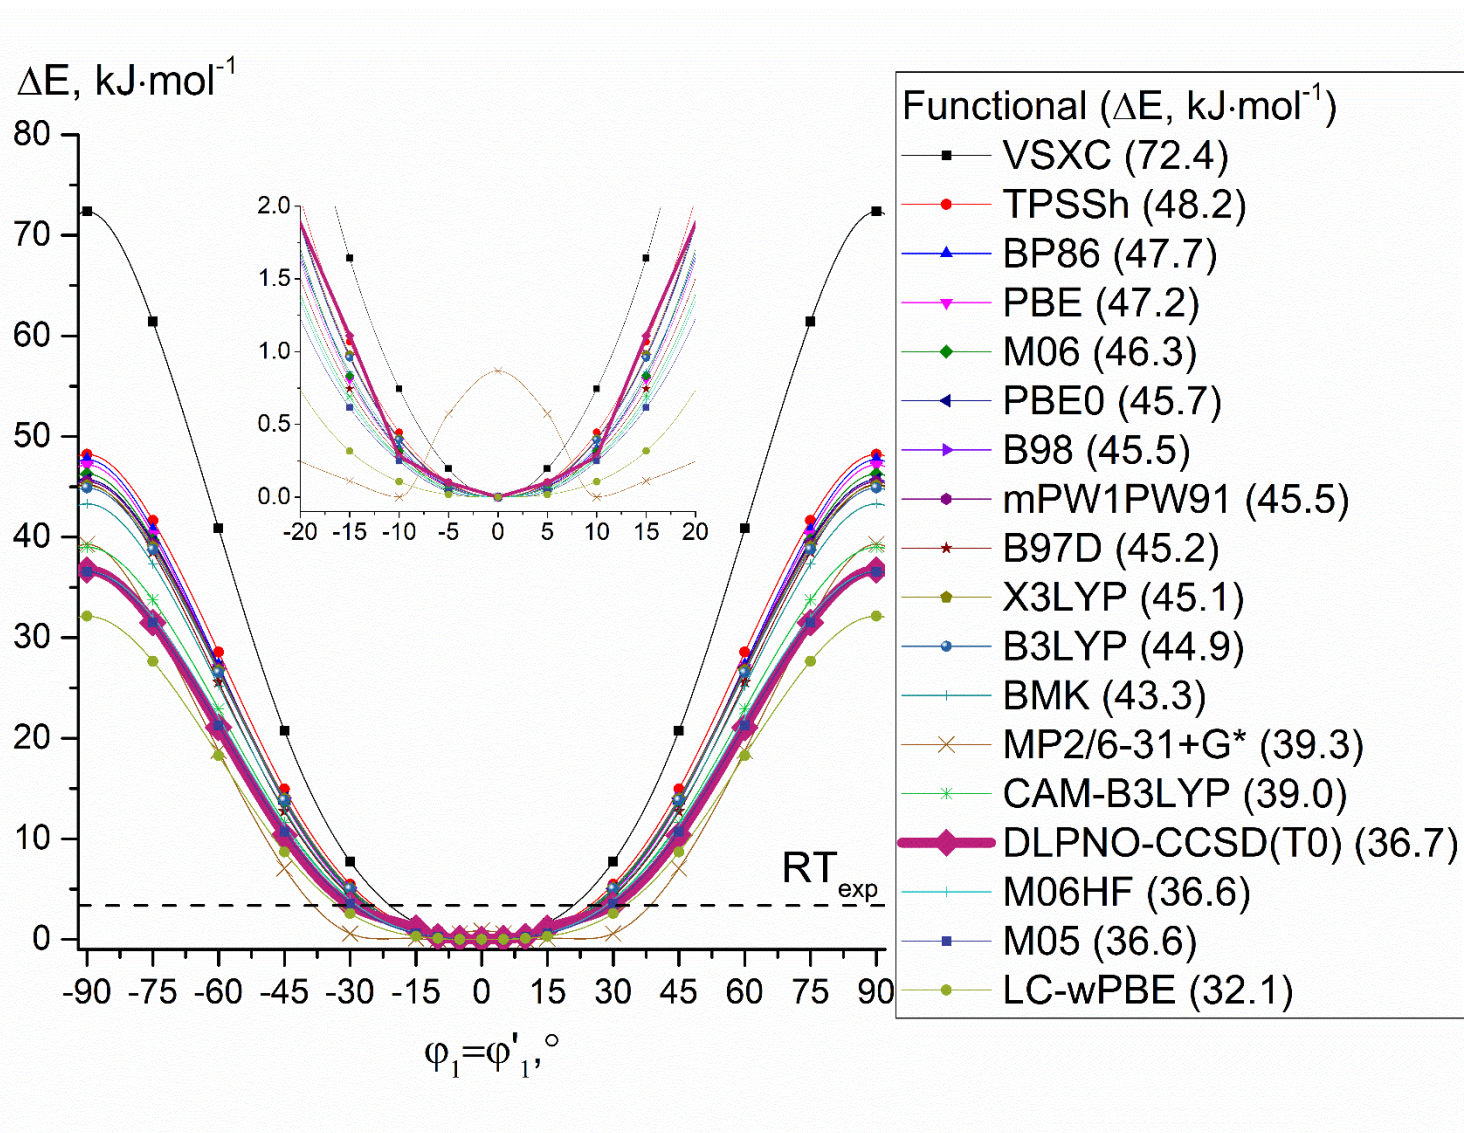

**Figure S12.** Potential energy function of simultaneous rotation of two phenyl rings around the N<sub>1</sub>-C<sub>2</sub> and N'<sub>1</sub>-C'<sub>2</sub> bonds in the E-AB molecule, calculated using different approximations. In all DFT calculations pcseg-2 basis set was used. DLPNO-CCSD(T0)/CBS was calculated using geometry optimized by B3LYP-D3/pcseg-2. Dashed line RT corresponds to the temperature of GED experiment ( $T_{\text{exp}}=407$  K) [30].



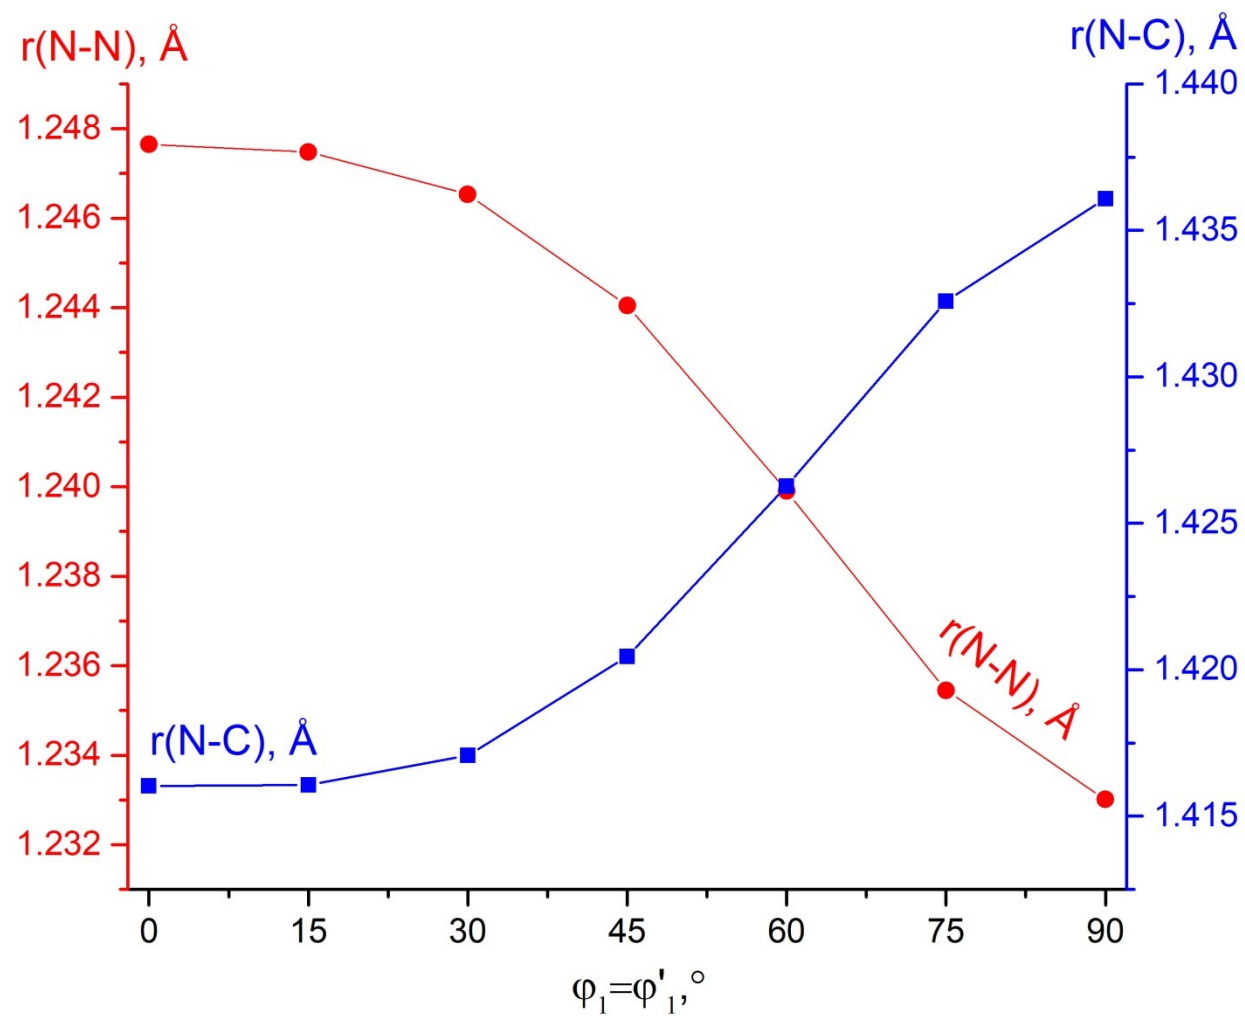

**Figure S13.** Internuclear distances  $\text{N}_1\text{-N}'_1$  (red circles) and  $\text{N}_1\text{-C}_2$  (blue squares) vs. dihedral angles  $\varphi_1$  and  $\varphi'_1$  in the E-AB molecule from the B3LYP-D3/pcseg-2 calculations.

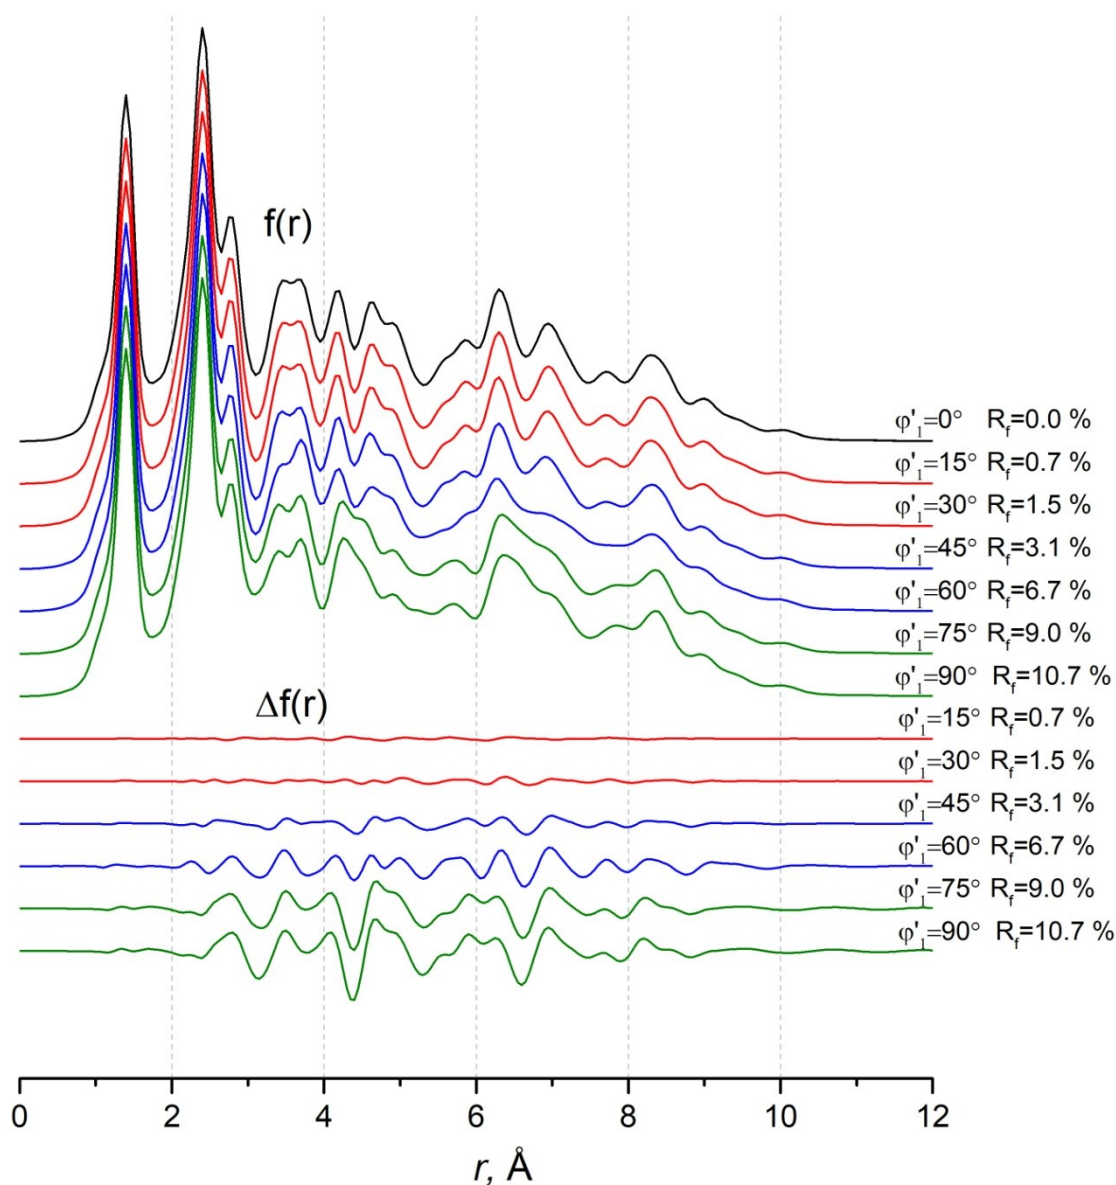

**Figure S14.** Comparison of theoretical radial distribution functions  $f(r)$  of pseudoconformers of E-AB. Pseudoconformers obtained by rotation of one phenyl group were considered. Differences functions  $\Delta f(r)$  were calculated concerning planar E-AB ( $\varphi_i = \varphi'_i = 0^\circ$ ). Molecular parameters were calculated at B3LYP-D3/pcseg-2 theory level. Vibrational amplitudes and corrections were obtained from the harmonic ( $r_{h1}-r_a$ ) force fields using the VibModule program for the B3LYP-D3/pcseg-2 calculations (in cases of pseudoconformers with  $\varphi'_i = 60^\circ, 75^\circ, 90^\circ$ , imaginary frequencies were considered as real).

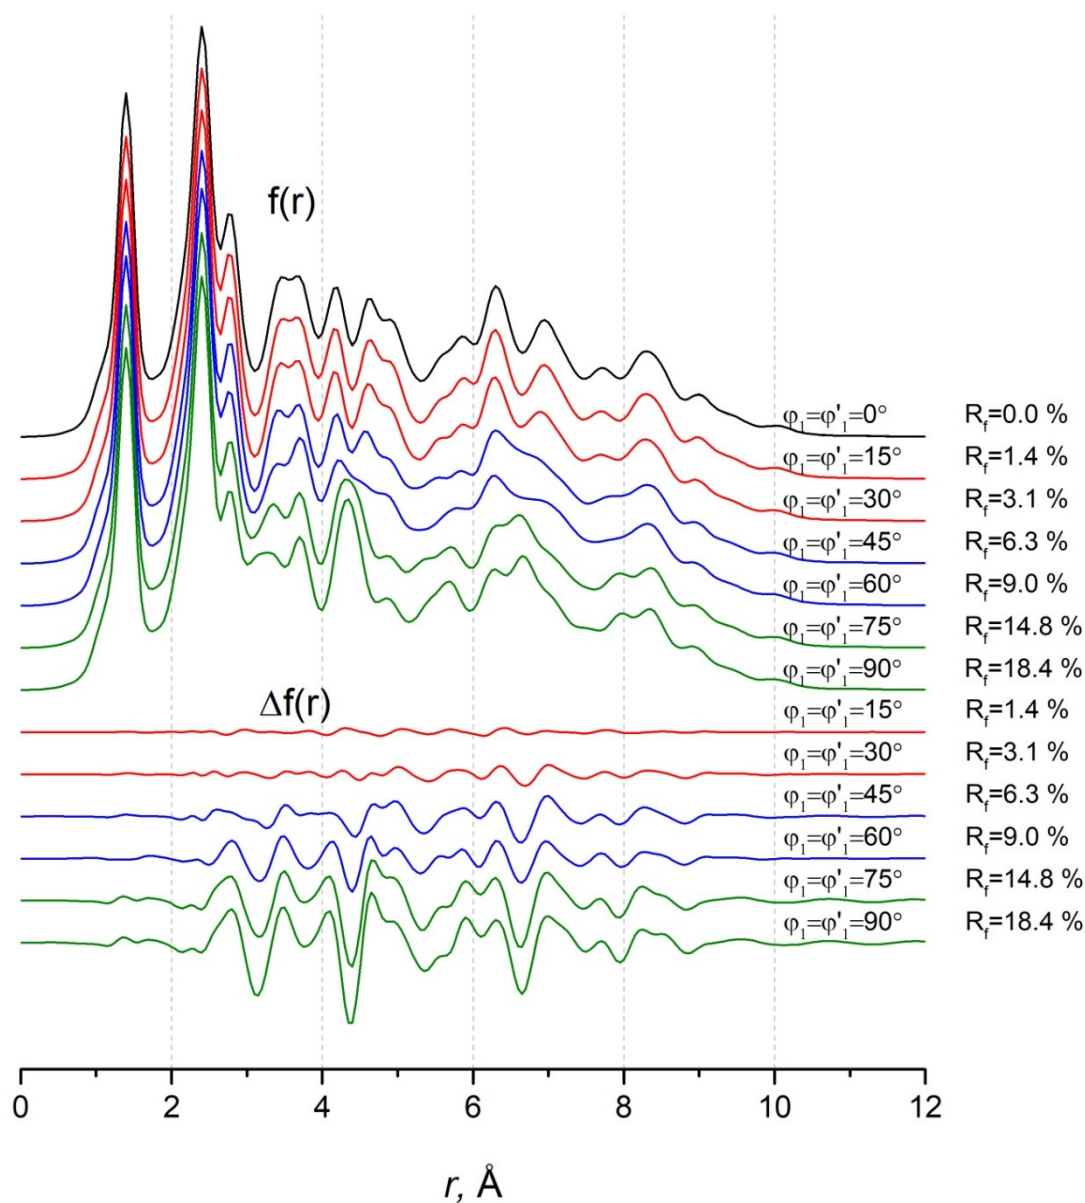

**Figure S15.** Comparison of theoretical radial distribution functions  $f(r)$  of pseudoconformers of E-AB. Pseudoconformers obtained by rotation of two phenyl group were considered. Differences functions  $\Delta f(r)$  were calculated concerning planar E-AB ( $\varphi_1 = \varphi'_1 = 0^\circ$ ). Molecular parameters were calculated at B3LYP-D3/pcseg-2 theory level. Vibrational amplitudes and corrections were obtained from the harmonic ( $r_{h1} - r_a$ ) force fields using the VibModule program for the B3LYP-D3/pcseg-2 calculations (in cases of pseudoconformers with  $\varphi_1 = \varphi'_1 = 60^\circ, 75^\circ, 90^\circ$ , imaginary frequencies were considered as real).

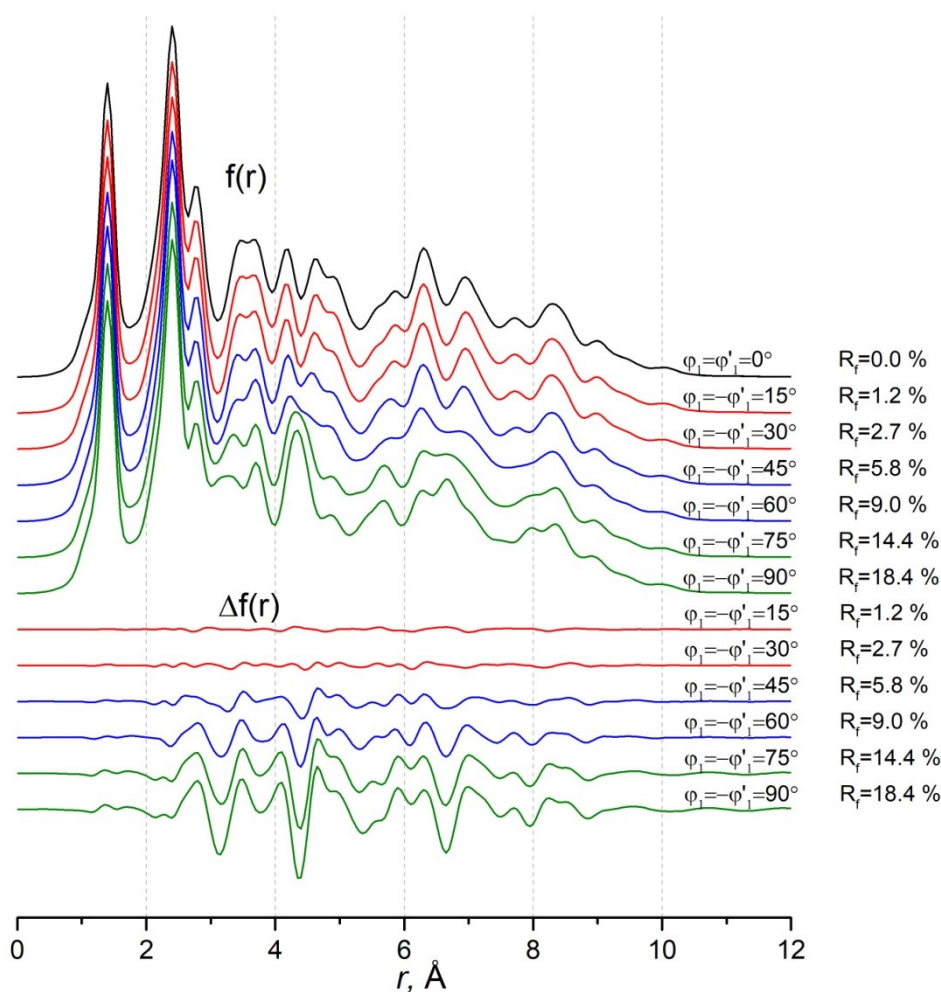

**Figure S16.** Comparison of theoretical radial distribution functions  $f(r)$  of pseudoconformers of E-AB. Pseudoconformers obtained by rotation of two phenyl group were considered. Differences functions  $\Delta f(r)$  were calculated concerning planar E-AB ( $\varphi_1 = \varphi'_1 = 0^\circ$ ). Molecular parameters were calculated at B3LYP-D3/pcseg-2 theory level. Vibrational amplitudes and corrections were obtained from the harmonic ( $r_{hi} - r_a$ ) force fields using the VibModule program for the B3LYP-D3/pcseg-2 calculations (in cases of pseudoconformers with  $\varphi_1 = -\varphi'_1 = 60^\circ, 75^\circ, 90^\circ$ , imaginary frequencies were considered as real).



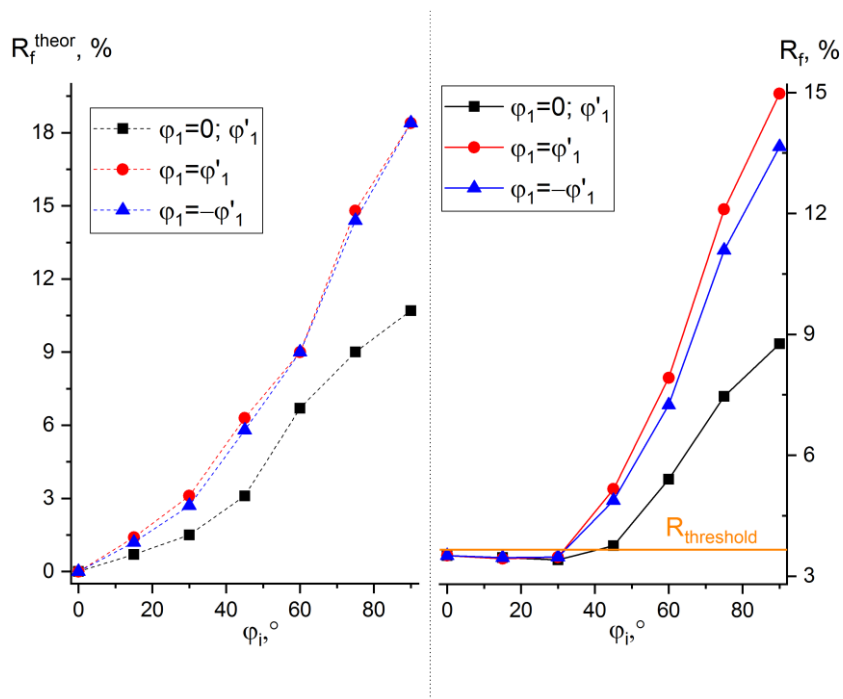

**Figure S17.** The ratio of disagreement factors  $R_f$  as a function of torsion angles  $\varphi_1$  and  $\varphi'_1$ , responsible for rotation of phenyls:  $R_f^{theor}$  – factor of disagreement between theoretical molecular scattering intensities  $sM(s)$  of pseudoconformer and planar conformer with  $\varphi_1=\varphi'_1=0^\circ$ ;  $R_f$  – factor of disagreement between experimental and theoretical molecular scattering intensities  $sM(s)$  (experimental data were taken from the work [30]);  $R_{threshold}$  – uncertainty according to the Hamilton's statistical criterion [91] at 0.05 significance level.

**Table S1.** Unex Z-matrix of E-AB

|    |   |    |       |    |       |    |       |   |
|----|---|----|-------|----|-------|----|-------|---|
| 1  | N |    |       |    |       |    |       |   |
| 2  | N | 1  | NN    |    |       |    |       |   |
| 3  | C | 1  | RN1   | 2  | AN1   |    |       |   |
| 4  | C | 2  | RN1_  | 1  | AN1_  | 3  | T     |   |
| 5  | C | 3  | RCC1  | 1  | AC1   | 2  | T1    |   |
| 6  | C | 4  | RCC1_ | 2  | AC1_  | 1  | T1_   |   |
| 7  | C | 5  | RCC2  | 3  | AC2   | 1  | T2    |   |
| 8  | C | 6  | RCC2_ | 4  | AC2_  | 2  | T2_   |   |
| 9  | C | 7  | RCC3  | 5  | AC3   | 3  | TPh1  |   |
| 10 | C | 8  | RCC3_ | 6  | AC3_  | 4  | TPh1_ |   |
| 11 | C | 9  | RCC4  | 7  | AC4   | 5  | TPh2  |   |
| 12 | C | 10 | RCC4_ | 8  | AC4_  | 6  | TPh2_ |   |
| 13 | C | 3  | RCC5  | 11 | RCC6  | 5  | TPh3  | 4 |
| 14 | C | 4  | RCC5_ | 12 | RCC6_ | 6  | TPh3_ | 4 |
| 15 | H | 5  | RCH1  | 3  | ACH1  | 7  | TH1   |   |
| 16 | H | 6  | RCH1_ | 4  | ACH1_ | 8  | TH1_  |   |
| 17 | H | 7  | RCH2  | 5  | ACH2  | 9  | TH2   |   |
| 18 | H | 8  | RCH2_ | 6  | ACH2_ | 10 | TH2_  |   |
| 19 | H | 9  | RCH3  | 7  | ACH3  | 11 | TH3   |   |
| 20 | H | 10 | RCH3_ | 8  | ACH3_ | 12 | TH3_  |   |
| 21 | H | 11 | RCH4  | 9  | ACH4  | 13 | TH4   |   |
| 22 | H | 12 | RCH4_ | 10 | ACH4_ | 14 | TH4_  |   |
| 23 | H | 13 | RCH5  | 3  | ACH5  | 11 | TH5   |   |
| 24 | H | 14 | RCH5_ | 4  | ACH5_ | 12 | TH5_  |   |
| 1  | N |    |       |    |       |    |       |   |
| 2  | N | 1  | NN    |    |       |    |       |   |
| 3  | C | 1  | RN1   | 2  | AN1   |    |       |   |
| 4  | C | 2  | RN1_  | 1  | AN1_  | 3  | T     |   |
| 5  | C | 3  | RCC1  | 1  | AC1   | 2  | T1    |   |
| 6  | C | 4  | RCC1_ | 2  | AC1_  | 1  | T1_   |   |
| 7  | C | 5  | RCC2  | 3  | AC2   | 1  | T2    |   |
| 8  | C | 6  | RCC2_ | 4  | AC2_  | 2  | T2_   |   |
| 9  | C | 7  | RCC3  | 5  | AC3   | 3  | TPh1  |   |
| 10 | C | 8  | RCC3_ | 6  | AC3_  | 4  | TPh1_ |   |
| 11 | C | 9  | RCC4  | 7  | AC4   | 5  | TPh2  |   |
| 12 | C | 10 | RCC4_ | 8  | AC4_  | 6  | TPh2_ |   |

**Table S2.** Structural parameters (Å) of E-AB according different DFT-calculations. A three-color-gradient scale indicates the ranking of parameters by values (green – maximal value of parameter, yellow – medium, red – minimal).

|                                                  | B3LYP  | B97D   | B98    | BMK    | BP86   | CAM-B3LYP | LC-wPBE | M05    | M06    | M06HF  | mPW1PW91 | PBE0   | PBE    | TPSSH  | VSXC   | X3LYP  | min    | max    | max – min | R <sup>a</sup> , % |
|--------------------------------------------------|--------|--------|--------|--------|--------|-----------|---------|--------|--------|--------|----------|--------|--------|--------|--------|--------|--------|--------|-----------|--------------------|
| $r_e(N_1=N'_1)$                                  | 1.248  | 1.260  | 1.250  | 1.250  | 1.267  | 1.235     | 1.229   | 1.243  | 1.242  | 1.221  | 1.242    | 1.242  | 1.265  | 1.255  | 1.260  | 1.246  | 1.221  | 1.267  | 0.045     | 3.6                |
| $r_e(N_1-C_2)$                                   | 1.417  | 1.416  | 1.418  | 1.419  | 1.419  | 1.419     | 1.424   | 1.417  | 1.413  | 1.430  | 1.411    | 1.411  | 1.417  | 1.416  | 1.416  | 1.416  | 1.411  | 1.430  | 0.019     | 1.3                |
| $r_e(C_2-C_3)$                                   | 1.400  | 1.410  | 1.402  | 1.401  | 1.409  | 1.392     | 1.387   | 1.396  | 1.393  | 1.392  | 1.395    | 1.396  | 1.408  | 1.401  | 1.405  | 1.399  | 1.387  | 1.410  | 0.023     | 1.6                |
| $r_e(C_2-C_7)$                                   | 1.395  | 1.405  | 1.397  | 1.396  | 1.405  | 1.387     | 1.383   | 1.392  | 1.389  | 1.385  | 1.391    | 1.391  | 1.404  | 1.397  | 1.400  | 1.394  | 1.383  | 1.405  | 0.022     | 1.6                |
| $r_e(C_3-C_4)$                                   | 1.384  | 1.391  | 1.386  | 1.387  | 1.391  | 1.380     | 1.378   | 1.382  | 1.379  | 1.383  | 1.381    | 1.381  | 1.390  | 1.385  | 1.389  | 1.384  | 1.378  | 1.391  | 0.013     | 1.0                |
| $r_e(C_6-C_7)$                                   | 1.389  | 1.395  | 1.391  | 1.392  | 1.395  | 1.384     | 1.382   | 1.386  | 1.383  | 1.388  | 1.385    | 1.386  | 1.394  | 1.390  | 1.393  | 1.388  | 1.382  | 1.395  | 0.013     | 1.0                |
| $r_e(C_4-C_5)$                                   | 1.395  | 1.403  | 1.397  | 1.398  | 1.404  | 1.389     | 1.386   | 1.392  | 1.389  | 1.392  | 1.391    | 1.392  | 1.402  | 1.397  | 1.402  | 1.395  | 1.386  | 1.404  | 0.017     | 1.2                |
| $r_e(C_5-C_6)$                                   | 1.390  | 1.398  | 1.392  | 1.392  | 1.398  | 1.384     | 1.381   | 1.387  | 1.384  | 1.386  | 1.386    | 1.387  | 1.397  | 1.391  | 1.396  | 1.389  | 1.381  | 1.398  | 0.017     | 1.2                |
| $r_e(C-C)_{av}$                                  | 1.392  | 1.400  | 1.394  | 1.394  | 1.400  | 1.386     | 1.383   | 1.389  | 1.386  | 1.388  | 1.388    | 1.389  | 1.399  | 1.394  | 1.397  | 1.391  | 1.383  | 1.400  | 0.017     | 1.2                |
| $\Delta r_e(C_i-C_j)=r_e(C_i-C_j)-r_e(C_2-C_3)$  |        |        |        |        |        |           |         |        |        |        |          |        |        |        |        |        |        |        |           |                    |
| $\Delta r_e(C_2-C_7)$                            | -0.005 | -0.005 | -0.005 | -0.005 | -0.004 | -0.005    | -0.005  | -0.004 | -0.004 | -0.006 | -0.005   | -0.005 | -0.004 | -0.004 | -0.005 | -0.005 | -0.006 | -0.004 | 0.002     | 0.2                |
| $\Delta r_e(C_3-C_4)$                            | -0.016 | -0.020 | -0.016 | -0.014 | -0.018 | -0.012    | -0.009  | -0.015 | -0.014 | -0.009 | -0.015   | -0.015 | -0.018 | -0.016 | -0.016 | -0.015 | -0.020 | -0.009 | 0.011     | 0.8                |
| $\Delta r_e(C_6-C_7)$                            | -0.011 | -0.015 | -0.011 | -0.009 | -0.014 | -0.008    | -0.005  | -0.011 | -0.010 | -0.003 | -0.011   | -0.010 | -0.014 | -0.012 | -0.012 | -0.011 | -0.015 | -0.003 | 0.012     | 0.8                |
| $\Delta r_e(C_4-C_5)$                            | -0.005 | -0.007 | -0.005 | -0.003 | -0.006 | -0.003    | -0.001  | -0.004 | -0.004 | 0.001  | -0.004   | -0.004 | -0.006 | -0.004 | -0.003 | -0.005 | -0.007 | 0.001  | 0.008     | 0.6                |
| $\Delta r_e(C_5-C_6)$                            | -0.010 | -0.013 | -0.010 | -0.009 | -0.011 | -0.008    | -0.006  | -0.009 | -0.009 | -0.005 | -0.009   | -0.009 | -0.011 | -0.010 | -0.009 | -0.010 | -0.013 | -0.005 | 0.007     | 0.5                |
| $\Delta r_e(C_i-C_j)=r_e(C_i-C_j)-r_e(N_1-C_2)$  |        |        |        |        |        |           |         |        |        |        |          |        |        |        |        |        |        |        |           |                    |
| $\Delta r_e(C_2-C_3)$                            | -0.017 | -0.006 | -0.016 | -0.018 | -0.010 | -0.028    | -0.037  | -0.020 | -0.019 | -0.038 | -0.016   | -0.015 | -0.009 | -0.015 | -0.011 | -0.017 | -0.038 | -0.006 | 0.032     | 2.3                |
| $\Delta r_e(C_2-C_7)$                            | -0.021 | -0.011 | -0.021 | -0.023 | -0.014 | -0.033    | -0.041  | -0.024 | -0.024 | -0.044 | -0.020   | -0.020 | -0.013 | -0.020 | -0.016 | -0.022 | -0.044 | -0.011 | 0.033     | 2.4                |
| $\Delta r_e(C_3-C_4)$                            | -0.032 | -0.026 | -0.032 | -0.032 | -0.028 | -0.040    | -0.046  | -0.035 | -0.034 | -0.047 | -0.030   | -0.030 | -0.027 | -0.031 | -0.027 | -0.032 | -0.047 | -0.026 | 0.021     | 1.5                |
| $\Delta r_e(C_6-C_7)$                            | -0.028 | -0.021 | -0.027 | -0.027 | -0.023 | -0.035    | -0.042  | -0.031 | -0.030 | -0.042 | -0.026   | -0.025 | -0.023 | -0.027 | -0.023 | -0.028 | -0.042 | -0.021 | 0.021     | 1.5                |
| $\Delta r_e(C_4-C_5)$                            | -0.022 | -0.013 | -0.021 | -0.021 | -0.015 | -0.030    | -0.038  | -0.025 | -0.023 | -0.037 | -0.020   | -0.019 | -0.015 | -0.020 | -0.014 | -0.021 | -0.038 | -0.013 | 0.025     | 1.8                |
| $\Delta r_e(C_5-C_6)$                            | -0.027 | -0.019 | -0.026 | -0.027 | -0.021 | -0.036    | -0.043  | -0.030 | -0.029 | -0.044 | -0.025   | -0.024 | -0.020 | -0.025 | -0.020 | -0.027 | -0.044 | -0.019 | 0.025     | 1.8                |
| $\Delta r_e(X_i-X_j)=r_e(X_i-X_j)-r_e(N_1=N'_1)$ |        |        |        |        |        |           |         |        |        |        |          |        |        |        |        |        |        |        |           |                    |
| $\Delta r_e(N_1-C_2)$                            | 0.169  | 0.156  | 0.168  | 0.169  | 0.152  | 0.184     | 0.195   | 0.174  | 0.171  | 0.209  | 0.169    | 0.169  | 0.152  | 0.161  | 0.156  | 0.170  | 0.152  | 0.209  | 0.056     | 4.0                |
| $\Delta r_e(C_2-C_3)$                            | 0.152  | 0.150  | 0.152  | 0.151  | 0.143  | 0.157     | 0.158   | 0.154  | 0.152  | 0.170  | 0.154    | 0.154  | 0.143  | 0.146  | 0.144  | 0.153  | 0.143  | 0.170  | 0.028     | 2.0                |
| $\Delta r_e(C_2-C_7)$                            | 0.147  | 0.145  | 0.147  | 0.146  | 0.139  | 0.152     | 0.154   | 0.150  | 0.147  | 0.164  | 0.149    | 0.149  | 0.139  | 0.142  | 0.140  | 0.148  | 0.139  | 0.164  | 0.026     | 1.8                |
| $\Delta r_e(C_3-C_4)$                            | 0.136  | 0.131  | 0.136  | 0.137  | 0.125  | 0.145     | 0.149   | 0.139  | 0.137  | 0.162  | 0.139    | 0.139  | 0.126  | 0.130  | 0.129  | 0.137  | 0.125  | 0.162  | 0.037     | 2.7                |
| $\Delta r_e(C_6-C_7)$                            | 0.141  | 0.135  | 0.141  | 0.142  | 0.129  | 0.149     | 0.153   | 0.143  | 0.141  | 0.167  | 0.143    | 0.143  | 0.130  | 0.135  | 0.132  | 0.142  | 0.129  | 0.167  | 0.038     | 2.7                |
| $\Delta r_e(C_4-C_5)$                            | 0.147  | 0.143  | 0.147  | 0.148  | 0.137  | 0.154     | 0.157   | 0.149  | 0.148  | 0.171  | 0.150    | 0.150  | 0.138  | 0.142  | 0.142  | 0.148  | 0.137  | 0.171  | 0.034     | 2.5                |
| $\Delta r_e(C_5-C_6)$                            | 0.142  | 0.138  | 0.142  | 0.142  | 0.132  | 0.149     | 0.152   | 0.144  | 0.142  | 0.165  | 0.144    | 0.144  | 0.132  | 0.136  | 0.136  | 0.143  | 0.132  | 0.165  | 0.033     | 2.4                |

<sup>a</sup> determined by equation (7).

**Table S3.** Relative energies <sup>ab</sup> ( $\Delta E$ , kJ·mol<sup>-1</sup>) of E-AB according DLPNO-CCSD(T0) calculations. A three-color-gradient scale indicates the ranking of parameters by values (green – minimal value of  $\Delta E$ , yellow – medium, red – maximal).

| E-AB                            | B3LYP | B97D | B98 | BMK | BP86 | CAM-B3LYP | LC-wPBE | M05 | M06 | M06HF | mPW1PW91 | PBE0 | PBE | TPSSh | VSXC | X3LYP |
|---------------------------------|-------|------|-----|-----|------|-----------|---------|-----|-----|-------|----------|------|-----|-------|------|-------|
| DLPNO-CCSD(T0)/CBS <sup>c</sup> | 0.5   | 2.8  | 0.2 | 0.0 | 3.7  | 2.4       | 4.0     | 0.9 | 2.2 | 3.1   | 1.5      | 1.4  | 3.1 | 0.1   | 0.9  | 0.6   |
| DLPNO-CCSD(T0)/cc-pVQZ          | 0.7   | 2.1  | 0.2 | 0.0 | 2.8  | 3.2       | 5.0     | 1.4 | 3.0 | 4.0   | 2.2      | 2.0  | 2.3 | 0.1   | 0.5  | 0.9   |
| DLPNO-CCSD(T0)/cc-pVTZ          | 1.4   | 1.1  | 0.4 | 0.2 | 1.5  | 4.9       | 7.1     | 2.5 | 4.6 | 5.7   | 3.6      | 3.2  | 1.3 | 0.4   | 0.0  | 1.7   |

<sup>a</sup>  $\Delta E_i^{E-Ab} = (E_i^{E-Ab} - E_{min}^{E-Ab}) \times 2625.5$ , where i corresponds to the optimized geometry obtained by calculations using one of the considered DFT functionals.

<sup>b</sup> DLPNO-CCSD(T0) calculations were performed using corresponding optimized geometries from DFT/pcseg-2 calculations.

**Table S4.** Relative energies <sup>ab</sup> ( $\Delta E$ , kJ·mol<sup>-1</sup>) of Z-AB according DLPNO-CCSD(T0) calculations. A three-color-gradient scale indicates the ranking of parameters by values (green – minimal value of  $\Delta E$ , yellow – medium, red – maximal).

|                                 | B3LYP | B97D | B98 | BMK | BP86 | CAM-B3LYP | LC-wPBE | M05 | M06 | M06HF | mPW1PW91 | PBE0 | PBE | TPSSh | VSXC | X3LYP |
|---------------------------------|-------|------|-----|-----|------|-----------|---------|-----|-----|-------|----------|------|-----|-------|------|-------|
| DLPNO-CCSD(T0)/CBS <sup>c</sup> | 1.6   | 2.2  | 0.7 | 0.0 | 4.8  | 2.4       | 3.3     | 2.0 | 2.2 | 1.7   | 2.0      | 1.6  | 3.9 | 0.8   | 1.8  | 1.4   |
| DLPNO-CCSD(T0)/cc-pVQZ          | 1.8   | 1.6  | 0.7 | 0.0 | 3.9  | 3.2       | 4.5     | 2.6 | 3.1 | 2.6   | 2.7      | 2.2  | 3.2 | 0.7   | 1.6  | 1.8   |
| DLPNO-CCSD(T0)/cc-pVTZ          | 2.0   | 0.5  | 0.8 | 0.0 | 2.5  | 4.7       | 6.5     | 3.6 | 4.6 | 4.0   | 3.9      | 3.4  | 2.0 | 0.7   | 1.1  | 2.4   |

<sup>a</sup>  $\Delta E_i^{Z-Ab} = (E_i^{Z-Ab} - E_{min}^{Z-Ab}) \times 2625.5$ , where i corresponds to the optimized geometry obtained by calculations using one of the considered DFT functionals.

<sup>b</sup> DLPNO-CCSD(T0) calculations were performed using corresponding optimized geometries from DFT/pcseg-2 calculations.

**Table S5.** Energies <sup>ab</sup> ( $\Delta E$ , kJ·mol<sup>-1</sup>) of Z-AB relative to the E-AB according DLPNO-CCSD(T0) calculations.

|                                 | B3LYP | B97D | B98  | BMK  | BP86 | CAM-B3LYP | LC-wPBE | M05  | M06  | M06HF | mPW1PW91 | PBE0 | PBE  | TPSSh | VSXC | X3LYP | $\Delta E_{min}$ | $\Delta E_{max}$ | $\Delta E_{max} - \Delta E_{min}$ |
|---------------------------------|-------|------|------|------|------|-----------|---------|------|------|-------|----------|------|------|-------|------|-------|------------------|------------------|-----------------------------------|
| DFT                             | 63.2  | 44.0 | 61.2 | 60.0 | 57.6 | 62.0      | 55.5    | 54.5 | 55.2 | 52.4  | 61.0     | 60.2 | 56.2 | 59.6  | 42.7 | 63.4  | 42.7             | 63.4             | 20.6                              |
| DLPNO-CCSD(T0)/CBS <sup>c</sup> | 51.8  | 50.0 | 51.2 | 50.7 | 51.7 | 50.7      | 50.0    | 51.8 | 50.7 | 49.3  | 51.2     | 50.9 | 51.5 | 51.4  | 51.6 | 51.5  | 49.3             | 51.8             | 2.5                               |
| DLPNO-CCSD(T0)/cc-pVQZ          | 51.9  | 50.3 | 51.4 | 50.9 | 52.0 | 50.9      | 50.3    | 52.0 | 51.0 | 49.5  | 51.4     | 51.2 | 51.8 | 51.5  | 52.0 | 51.7  | 49.5             | 52.0             | 2.6                               |
| DLPNO-CCSD(T0)/cc-pVTZ          | 52.1  | 50.9 | 51.8 | 51.2 | 52.4 | 51.3      | 50.9    | 52.5 | 51.5 | 49.7  | 51.8     | 51.7 | 52.2 | 51.8  | 52.6 | 52.2  | 49.7             | 52.6             | 2.9                               |

<sup>a</sup>  $\Delta E_i = (E_i^{Z-Ab} - E_i^{E-Ab}) \times 2625.5$ , where i corresponds to the optimized geometries obtained by calculations using one of the considered DFT functionals.

<sup>b</sup> DLPNO-CCSD(T0) calculations were performed using corresponding optimized geometries from DFT/pcseg-2 calculations.



**Table S6.** Relative energies of pseudoconformers of E-AB and vibrational frequency of phenyls rotations according DFT<sup>a</sup>, MP2 and DLPNO-CCSD(T0) calculations. A three-color-gradient scale indicates the ranking of parameters by values (green – maximal value of parameter, yellow – medium, red – minimal).

|                                                  | B3LYP | B97D | B98  | BMK  | BP86 | CAM-B3LYP | LC-wPBE | M05  | M06  | M06HF | mPW1PW91 | PBE0 | PBE  | TPSSh | VSXC | X3LYP | DLPNO-CCSD(T0)/CBS <sup>b</sup> | DLPNO-CCSD(T0)/cc-pVQZ <sup>b</sup> | DLPNO-CCSD(T0)/cc-pVTZ <sup>b</sup> | MP2/6-31+G* |
|--------------------------------------------------|-------|------|------|------|------|-----------|---------|------|------|-------|----------|------|------|-------|------|-------|---------------------------------|-------------------------------------|-------------------------------------|-------------|
| $\Delta E^c$ , kJ·mol <sup>-1</sup><br>(conf-30) | 5.0   | 4.3  | 5.1  | 4.5  | 4.8  | 4.0       | 2.6     | 3.6  | 4.9  | 3.9   | 5.1      | 5.1  | 4.7  | 5.5   | 7.8  | 5.1   | 3.4                             | 3.6                                 | 3.8                                 | -0.3        |
| $\Delta E^d$ , kJ·mol <sup>-1</sup><br>(conf-90) | 44.9  | 45.2 | 45.5 | 43.3 | 47.7 | 39.0      | 32.1    | 36.6 | 46.3 | 36.6  | 45.5     | 45.7 | 47.2 | 48.2  | 72.4 | 45.1  | 36.7                            | 37.2                                | 38.0                                | 39.3        |
| $\omega_{\text{rot.Ph}}$ , cm <sup>-1</sup>      | 19.4  | 17.3 | 19.1 | 17.1 | 17.4 | 16.1      | 6.6     | 11.4 | 16.2 | 12.3  | 19.8     | 19.3 | 16.6 | 20.3  | 28.6 | 19.8  | -                               | -                                   | -                                   | 11.5(i)     |

<sup>a</sup> using pcseg-2 basis set;

<sup>b</sup> using geometry optimized by B3LYP-D3/pcseg-2.

<sup>c</sup>  $\Delta E = E(\text{E-AB with } \varphi_I=\varphi'_I=30^\circ) - E(\text{E-AB with } \varphi_I=\varphi'_I=0^\circ)$ ;

<sup>d</sup>  $\Delta E = E(\text{E-AB with } \varphi_I=\varphi'_I=90^\circ) - E(\text{E-AB with } \varphi_I=\varphi'_I=0^\circ)$ .

**Table S7.** Internuclear distances  $r_g$  of E-AB determined by MOCED structural analyzes using starting internuclear distances  $r_e$ , vibrational amplitudes  $l$  and corrections  $r_e - r_a$  from results of different DFT calculations.

|                               | [30] <sup>a</sup> | current work <sup>b</sup> |          |          |           |          |               |           |           |           |           |          |          |          |          |           |          |
|-------------------------------|-------------------|---------------------------|----------|----------|-----------|----------|---------------|-----------|-----------|-----------|-----------|----------|----------|----------|----------|-----------|----------|
| Method <sup>c</sup>           | MP2/<br>6-31+G*   | B3LYP                     | B97D     | B98      | BMK       | BP86     | CAM-<br>B3LYP | LC-wPBE   | M05       | M06       | M06HF     | mPW1PW91 | PBE      | PBE0     | TPSSh    | VSXC      | X3LYP    |
| $R_f^d$                       |                   | 3.7                       | 3.7      | 3.8      | 3.9       | 3.7      | 3.8           | 21.1      | 5.9       | 3.9       | 4.4       | 3.7      | 3.8      | 3.7      | 3.8      | 4.5       | 3.7      |
| $r_g(\text{N-N})$             | 1.260(8)          | 1.260(8)                  | 1.260(8) | 1.260(8) | 1.261(8)  | 1.260(8) | 1.262(8)      | 1.282(36) | 1.256(12) | 1.261(8)  | 1.265(8)  | 1.260(8) | 1.261(8) | 1.260(8) | 1.259(8) | 1.256(10) | 1.260(8) |
| $r_g(\text{N-C})$             | 1.427(8)          | 1.427(9)                  | 1.428(9) | 1.426(9) | 1.428(10) | 1.428(9) | 1.429(9)      | 1.350(16) | 1.412(8)  | 1.429(10) | 1.428(11) | 1.426(9) | 1.428(9) | 1.427(9) | 1.426(9) | 1.422(11) | 1.426(9) |
| $r_g(\text{C-C})_{\text{av}}$ | 1.399(1)          | 1.398(3)                  | 1.397(3) | 1.398(3) | 1.397(3)  | 1.397(3) | 1.397(3)      | 1.409(6)  | 1.399(3)  | 1.397(3)  | 1.397(4)  | 1.398(3) | 1.397(3) | 1.398(3) | 1.398(3) | 1.398(4)  | 1.398(3) |
| $r_g(\text{C-H})_{\text{av}}$ | 1.102(7)          | 1.098(7)                  | 1.098(7) | 1.097(7) | 1.099(7)  | 1.098(7) | 1.100(7)      | 1.148(33) | 1.093(11) | 1.099(7)  | 1.104(8)  | 1.097(7) | 1.098(7) | 1.098(7) | 1.097(7) | 1.093(9)  | 1.097(7) |
| $R_f(0)^e$                    |                   | 8.5                       | 18.8     | 11.0     | 12.7      | 18.7     | 8.7           | 32.6      | 12.0      | 8.1       | 15.0      | 7.6      | 16.4     | 7.5      | 9.0      | 13.4      | 7.8      |

<sup>a</sup> uncertainties for the bond lengths were estimated as  $3\sigma_{LS}$ ;

<sup>b</sup> experimental data from ref. [30]; uncertainties for the bond lengths were estimated as  $[(2.5\sigma_{LS})^2 + (0.002r)^2]^{1/2}$ ;

<sup>c</sup> calculation method (DFT functional) that was used to obtain a set of initial parameters  $r_e$ ,  $l$  and  $r_e - r_a$ ; psceg-2 basis set was used in case of all DFT calculations;

<sup>d</sup> disagreement factors  $R_f$  obtained in LS analyzes; a three-color-gradient scale indicates the ranking of parameters by values (green – minimal value of parameter, yellow – medium, red – maximal);

<sup>e</sup> disagreement factor  $R_f$  obtained in first iteration of LS analyzes with refinement of scale factors for GED molecular intensity functions and without refinement of any structural parameters and vibrational amplitudes.

**Table S8.** Internuclear distances  $r_g$  of E-AB determined by MOCED structural analyzes using starting internuclear distances  $r_e$ , vibrational amplitudes  $l$  and corrections  $r_{h1}-r_a$  from results of different DFT calculations.

|                               | [30] <sup>a</sup> | current work <sup>b</sup> |          |          |          |          |               |           |           |          |          |          |          |          |          |          |          |
|-------------------------------|-------------------|---------------------------|----------|----------|----------|----------|---------------|-----------|-----------|----------|----------|----------|----------|----------|----------|----------|----------|
| Method <sup>c</sup>           | MP2/<br>6-31+G*   | B3LYP                     | B97D     | B98      | BMK      | BP86     | CAM-<br>B3LYP | LC-wPBE   | M05       | M06      | M06HF    | mPW1PW91 | PBE      | PBE0     | TPSSh    | VSXC     | X3LYP    |
| $R_f$ <sup>d</sup>            |                   | 3.5                       | 3.8      | 3.5      | 3.6      | 3.6      | 3.6           | 17.9      | 5.0       | 3.6      | 4.4      | 3.5      | 3.7      | 3.4      | 3.5      | 3.9      | 3.5      |
| $r_g(\text{N-N})$             | 1.260(8)          | 1.262(7)                  | 1.263(8) | 1.262(7) | 1.264(7) | 1.263(8) | 1.265(7)      | 1.485(32) | 1.264(10) | 1.264(7) | 1.267(8) | 1.262(7) | 1.263(8) | 1.262(7) | 1.261(7) | 1.258(8) | 1.262(7) |
| $r_g(\text{N-C})$             | 1.427(8)          | 1.425(8)                  | 1.425(8) | 1.425(7) | 1.427(8) | 1.426(8) | 1.428(8)      | 1.264(18) | 1.427(10) | 1.427(8) | 1.431(9) | 1.426(8) | 1.426(8) | 1.426(8) | 1.425(8) | 1.423(8) | 1.425(8) |
| $r_g(\text{C-C})_{\text{av}}$ | 1.399(1)          | 1.398(3)                  | 1.398(3) | 1.398(3) | 1.398(3) | 1.398(3) | 1.398(3)      | 1.397(5)  | 1.398(4)  | 1.398(3) | 1.397(3) | 1.398(3) | 1.398(3) | 1.398(3) | 1.398(3) | 1.398(3) | 1.398(3) |
| $r_g(\text{C-H})_{\text{av}}$ | 1.102(7)          | 1.099(7)                  | 1.100(7) | 1.099(7) | 1.101(7) | 1.100(7) | 1.102(7)      | 1.086(26) | 1.104(9)  | 1.101(7) | 1.106(8) | 1.099(7) | 1.100(7) | 1.099(7) | 1.098(7) | 1.094(8) | 1.098(7) |
| $R_f(0)$ <sup>e</sup>         |                   | 10.0                      | 7.4      | 7.5      | 7.7      | 7.0      | 18.2          | 34.8      | 13.1      | 18.8     | 13.6     | 16.4     | 5.7      | 15.5     | 8.4      | 6.3      | 11.1     |

<sup>a</sup> uncertainties for the bond lengths were estimated as  $3\sigma_{LS}$ ;

<sup>b</sup> experimental data from ref. [30]; uncertainties for the bond lengths were estimated as  $[(2.5\sigma_{LS})^2 + (0.002r)^2]^{1/2}$ ;

<sup>c</sup> calculation method (DFT functional) that was used to obtain a set of initial parameters  $r_e$ ,  $l$  and  $r_{h1}-r_a$ ; psceg-2 basis set was used in case of all DFT calculations;

<sup>d</sup> disagreement factors  $R_f$  obtained in LS analyzes; a three-color-gradient scale indicates the ranking of parameters by values (green – minimal value of parameter, yellow – medium, red – maximal);

<sup>e</sup> disagreement factor  $R_f$  obtained in first iteration of LS analyzes with refinement of scale factors for GED molecular intensity functions and without refinement of any structural parameters and vibrational amplitudes.

**Table S9.** Internuclear distances  $r_g$  and corresponding contribution of experimental GED data to parameters ( $w$ ) of E-AB determined by RM structural analyzes using starting internuclear distances  $r_e$ , vibrational amplitudes  $l$  and corrections  $r_e-r_a$  from results of different DFT calculations.

|                             | [30] <sup>a</sup> | current work <sup>b</sup> |           |                    |                    |           |               |             |           |          |           |           |           |           |                    |                    |           |
|-----------------------------|-------------------|---------------------------|-----------|--------------------|--------------------|-----------|---------------|-------------|-----------|----------|-----------|-----------|-----------|-----------|--------------------|--------------------|-----------|
| Method <sup>c</sup>         | MP2/<br>6-31+G*   | B3LYP                     | B97D      | B98                | BMK                | BP86      | CAM-<br>B3LYP | LC-<br>wPBE | M05       | M06      | M06HF     | mPW1PW91  | PBE       | PBE0      | TPSSh              | VSXC               | X3LYP     |
| $\alpha_{reg}$ <sup>d</sup> |                   | 0.002                     | 0.002     | 0.001 <sup>e</sup> | 0.001 <sup>e</sup> | 0.002     | 0.002         | 0.0005      | 0.003     | 0.004    | 0.002     | 0.002     | 0.004     | 0.002     | 0.001 <sup>e</sup> | 0.001 <sup>e</sup> | 0.001     |
| $R_f$ <sup>f</sup>          |                   | 4.7                       | 4.5       | 4.1                | 4.1                | 4.6       | 4.6           | 12.4        | 7.7       | 4.8      | 5.7       | 4.6       | 5.0       | 4.6       | 4.1                | 4.6                | 4.2       |
| $r_g(\text{N-N})$           | 1.260(8)          | 1.269(7)                  | 1.268(7)  | 1.264(6)           | 1.265(6)           | 1.272(7)  | 1.254(6)      | 1.238(18)   | 1.248(8)  | 1.255(5) | 1.244(7)  | 1.258(6)  | 1.272(6)  | 1.259(6)  | 1.265(6)           | 1.269(7)           | 1.261(6)  |
| $r_g(\text{C-N})$           | 1.427(8)          | 1.421(6)                  | 1.421(6)  | 1.424(6)           | 1.425(6)           | 1.423(6)  | 1.428(6)      | 1.407(24)   | 1.422(7)  | 1.424(5) | 1.440(7)  | 1.422(5)  | 1.421(6)  | 1.422(5)  | 1.424(6)           | 1.423(7)           | 1.423(6)  |
| $r_g(\text{C-C})_{av}$      | 1.399(1)          | 1.400(7)                  | 1.400(7)  | 1.398(7)           | 1.398(7)           | 1.400(7)  | 1.397(6)      | 1.397(28)   | 1.398(8)  | 1.397(5) | 1.394(8)  | 1.398(6)  | 1.400(6)  | 1.398(6)  | 1.398(7)           | 1.399(8)           | 1.398(7)  |
| $r_g(\text{H-C})_{av}$      | 1.102(7)          | 1.106(14)                 | 1.106(13) | 1.102(13)          | 1.103(14)          | 1.109(13) | 1.100(11)     | 1.100(59)   | 1.098(15) | 1.102(9) | 1.097(15) | 1.101(11) | 1.110(11) | 1.102(11) | 1.102(13)          | 1.101(16)          | 1.100(13) |
| $w(\text{N-N})$             | -                 | 0.71                      | 0.71      | 0.83               | 0.83               | 0.70      | 0.72          | 0.97        | 0.65      | 0.56     | 0.74      | 0.72      | 0.54      | 0.72      | 0.83               | 0.83               | 0.83      |
| $w(\text{C-N})$             | -                 | 0.69                      | 0.69      | 0.82               | 0.82               | 0.69      | 0.70          | 0.97        | 0.61      | 0.54     | 0.71      | 0.70      | 0.53      | 0.70      | 0.81               | 0.82               | 0.82      |
| $w(\text{C-C})_{av}$        | -                 | 0.69                      | 0.69      | 0.81               | 0.81               | 0.69      | 0.69          | 0.95        | 0.61      | 0.53     | 0.70      | 0.69      | 0.53      | 0.69      | 0.81               | 0.82               | 0.81      |
| $w(\text{H-C})_{av}$        | -                 | 0.10                      | 0.10      | 0.17               | 0.17               | 0.10      | 0.10          | 0.57        | 0.07      | 0.05     | 0.10      | 0.09      | 0.05      | 0.09      | 0.18               | 0.17               | 0.17      |
| $R_f(0)$ <sup>g</sup>       | -                 | 8.5                       | 18.8      | 11.0               | 12.7               | 18.7      | 8.7           | 32.6        | 12.0      | 8.1      | 15.0      | 7.6       | 16.4      | 7.5       | 9.0                | 13.4               | 7.8       |

<sup>a</sup> uncertainties for the bond lengths were estimated as  $3\sigma_{LS}$ ;

<sup>b</sup> experimental data from ref. [30]; uncertainties for the bond lengths were estimated as  $[(2.5\sigma_{LS})^2 + (0.002r)^2]^{1/2}$ ;

<sup>c</sup> calculation method (DFT functional) that was used to obtain a set of initial parameters  $r_e$ ,  $l$  and  $r_e-r_a$ ; psceg-2 basis set was used in case of all DFT calculations;

<sup>d</sup> regularization constant  $\alpha_{reg}$ , which was chosen according to Eq. (3);

<sup>e</sup> for these initial parameters, the minimum of  $\alpha_{reg}$  in the range from  $6 \cdot 10^{-5}$  to 0.01 was not found, therefore, a value of 0.001 was chosen;

<sup>f</sup> disagreement factors  $R_f$  obtained in LS analyzes; a three-color-gradient scale indicates the ranking of parameters by values (green – minimal value of parameter, yellow – medium, red – maximal);

<sup>g</sup> disagreement factor  $R_f$  obtained in first iteration of LS analyzes with refinement of scale factors for GED molecular intensity functions and without refinement of any structural parameters and vibrational amplitudes.



**Table S10.** Internuclear distances  $r_g$  and corresponding contribution of experimental GED data to parameters ( $w$ ) of E-AB determined by RM structural analyzes using starting internuclear distances  $r_e$ , vibrational amplitudes  $l$  and corrections  $r_{h1}-r_a$  from results of different DFT calculations in comparison with results of the work [30].

|                             | [30] <sup>a</sup> | current work <sup>b</sup> |           |           |           |          |               |             |                    |           |           |           |           |           |          |           |          |
|-----------------------------|-------------------|---------------------------|-----------|-----------|-----------|----------|---------------|-------------|--------------------|-----------|-----------|-----------|-----------|-----------|----------|-----------|----------|
| Method <sup>c</sup>         | MP2/<br>6-31+G*   | B3LYP                     | B97D      | B98       | BMK       | BP86     | CAM-<br>B3LYP | LC-<br>wPBE | M05                | M06       | M06HF     | mPW1PW91  | PBE       | PBE0      | TPSSh    | VSXC      | X3LYP    |
| $\alpha_{reg}$ <sup>d</sup> |                   | 0.002                     | 0.0008    | 0.0007    | 0.0007    | 0.009    | 0.005         | 0.0009      | 0.001 <sup>e</sup> | 0.003     | 0.001     | 0.006     | 0.0006    | 0.007     | 0.009    | 0.0004    | 0.006    |
| $R_f$ <sup>f</sup>          |                   | 4.9                       | 4.0       | 4.1       | 4.1       | 4.9      | 6.7           | 12.6        | 5.2                | 5.6       | 5.2       | 6.5       | 3.8       | 6.6       | 5.4      | 4.1       | 5.9      |
| $r_g(\text{N-N})$           | 1.260(8)          | 1.254(6)                  | 1.261(6)  | 1.260(6)  | 1.260(6)  | 1.267(4) | 1.242(7)      | 1.250(17)   | 1.255(7)           | 1.249(7)  | 1.248(7)  | 1.247(7)  | 1.265(6)  | 1.247(6)  | 1.256(5) | 1.264(7)  | 1.249(6) |
| $r_g(\text{C-N})$           | 1.427(8)          | 1.419(6)                  | 1.418(6)  | 1.420(6)  | 1.421(6)  | 1.419(4) | 1.425(6)      | 1.464(17)   | 1.423(7)           | 1.420(7)  | 1.429(8)  | 1.418(6)  | 1.420(6)  | 1.417(6)  | 1.420(4) | 1.420(7)  | 1.420(5) |
| $r_g(\text{C-C})_{av}$      | 1.399(1)          | 1.398(6)                  | 1.399(6)  | 1.398(6)  | 1.398(6)  | 1.400(4) | 1.395(6)      | 1.392(17)   | 1.397(7)           | 1.396(7)  | 1.396(8)  | 1.396(6)  | 1.399(6)  | 1.396(6)  | 1.397(4) | 1.399(7)  | 1.397(5) |
| $r_g(\text{H-C})_{av}$      | 1.102(7)          | 1.089(12)                 | 1.095(14) | 1.093(15) | 1.094(16) | 1.095(6) | 1.086(12)     | 1.087(51)   | 1.093(17)          | 1.088(13) | 1.091(18) | 1.086(11) | 1.098(15) | 1.088(10) | 1.087(7) | 1.095(20) | 1.086(9) |
| $w(\text{N-N})$             | -                 | 0.72                      | 0.86      | 0.88      | 0.88      | 0.35     | 0.51          | 0.92        | 0.83               | 0.63      | 0.84      | 0.46      | 0.89      | 0.43      | 0.36     | 0.93      | 0.46     |
| $w(\text{C-N})$             | -                 | 0.69                      | 0.84      | 0.86      | 0.86      | 0.34     | 0.48          | 0.91        | 0.81               | 0.60      | 0.82      | 0.44      | 0.88      | 0.41      | 0.34     | 0.92      | 0.44     |
| $w(\text{C-C})_{av}$        | -                 | 0.69                      | 0.84      | 0.86      | 0.86      | 0.34     | 0.48          | 0.88        | 0.81               | 0.60      | 0.82      | 0.43      | 0.88      | 0.39      | 0.34     | 0.92      | 0.43     |
| $w(\text{H-C})_{av}$        | -                 | 0.10                      | 0.21      | 0.23      | 0.23      | 0.02     | 0.04          | 0.30        | 0.18               | 0.07      | 0.18      | 0.03      | 0.26      | 0.03      | 0.02     | 0.34      | 0.04     |
| $R_f(0)$ <sup>g</sup>       | -                 | 10.0                      | 7.4       | 7.5       | 7.7       | 7.0      | 18.2          | 34.8        | 13.1               | 18.8      | 13.6      | 16.4      | 5.7       | 15.5      | 8.4      | 6.3       | 11.1     |

<sup>a</sup> uncertainties for the bond lengths were estimated as  $3\sigma_{LS}$ ;

<sup>b</sup> experimental data from ref. [30]; uncertainties for the bond lengths were estimated as  $[(2.5\sigma_{LS})^2 + (0.002r)^2]^{1/2}$ ;

<sup>c</sup> calculation method (DFT functional) that was used to obtain a set of initial parameters  $r_e$ ,  $l$  and  $r_{h1}-r_a$ ; psceg-2 basis set was used in case of all DFT calculations;

<sup>d</sup> regularization constant  $\alpha_{reg}$ , which was chosen according to Eq. (3);

<sup>e</sup> for these initial parameters, the minimum of  $\alpha_{reg}$  in the range from  $6 \cdot 10^{-5}$  to 0.01 was not found, therefore, a value of 0.001 was chosen;

<sup>f</sup> disagreement factors  $R_f$  obtained in LS analyzes; a three-color-gradient scale indicates the ranking of parameters by values (green – minimal value of parameter, yellow – medium, red – maximal);

<sup>g</sup> disagreement factors  $R_f$  obtained in first iteration of LS analyzes with refinement of scale factors for GED molecular intensity functions and without refinement of any structural parameters and vibrational amplitudes.

**Table S11.** Cartesian atomic coordinates of final semiexperimental equilibrium structure ( $r_e$ ) of E-AB according GED method ( $R_f=3.7\%$ , experimental data – from ref. [30], structural refinement – from our work: MOCED, semirigid model, starting parameters from B3LYP-D3/pcseg-2 calculations).

|   | x             | y             | z             |
|---|---------------|---------------|---------------|
| N | -0.3779954858 | 0.5006359865  | 0.0000000016  |
| N | 0.3779954858  | -0.5006359865 | 0.0000000016  |
| C | -1.7594962368 | 0.1859605794  | 0.0000000016  |
| C | 1.7594962368  | -0.1859605794 | 0.0000000016  |
| C | -2.2778763098 | -1.1114912717 | 0.0000000015  |
| C | 2.2778763098  | 1.1114912717  | 0.0000000015  |
| C | -3.6466799365 | -1.2983477821 | 0.0000000015  |
| C | 3.6466799365  | 1.2983477821  | 0.0000000015  |
| C | -4.5080908248 | -0.2043816279 | 0.0000000016  |
| C | 4.5080908248  | 0.2043816279  | 0.0000000016  |
| C | -3.9919335812 | 1.0828481558  | 0.0000000016  |
| C | 3.9919335812  | -1.0828481558 | 0.0000000016  |
| C | -2.6203600841 | 1.2805227620  | -0.0000000087 |
| C | 2.6203600841  | -1.2805227620 | -0.0000000087 |
| H | -1.6008485979 | -1.9460830373 | 0.0000000014  |
| H | 1.6008485979  | 1.9460830373  | 0.0000000014  |
| H | -4.0493892918 | -2.2973129109 | 0.0000000015  |
| H | 4.0493892918  | 2.2973129109  | 0.0000000015  |
| H | -5.5737527889 | -0.3593080475 | 0.0000000016  |
| H | 5.5737527889  | 0.3593080475  | 0.0000000016  |
| H | -4.6543744582 | 1.9315510369  | 0.0000000097  |
| H | 4.6543744582  | -1.9315510369 | 0.0000000097  |
| H | -2.1932171887 | 2.2684866754  | -0.0000000247 |
| H | 2.1932171887  | -2.2684866754 | -0.0000000247 |

[30] Tsuji, T.; Takashima, H.; Takeuchi, H.; Egawa, T.; Konaka, S. Molecular Structure and Torsional Potential of trans-Azobenzene. A Gas Electron Diffraction Study. J. Phys. Chem. A 2001, 105, 9347–9353, doi:10.1021/jp004418v

[91] Hamilton, W.C. Significance tests on the crystallographic R factor. Acta Crystallogr. 1965, 18, 502–510, doi:10.1107/S0365110X65001081
